# Supplementary material for: Towards DNA sensing polymers: interaction between acrylamide/3-(N,N-dimethylaminopropyl)-acrylamide and DNA phage λ at various N/P ratios
Source: Royal Society of Chemistry journal article supplement (doi:10.1039/c6ra11231e), 2016-01-01
Supplement: c6ra11231e1.pdf [file c6ra11231e1.pdf]

# Supporting information

## Towards DNA sensing polymers: interaction between acrylamide/3-(N, N-dimethylaminopropyl)-acrylamide and DNA phage $\lambda$ at various N/P ratios

N. K. Davydova<sup>1\*</sup>, O. V. Sinitsyna<sup>1</sup>, V. N. Sergeev<sup>1</sup>, I. Perevyazko<sup>2\*</sup>, E. E. Laukhina<sup>3\*</sup>

<sup>1</sup> A. N. Nesmeyanov Institute of Organoelement Compounds of Russian Academy of Sciences, Vavilova St. 28, Moscow, 119991, Russian Federation

<sup>2</sup> Department of Molecular Biophysics and Polymer Physics, St. Petersburg State University, Ulyanovskaya St. 1, 198504 St. Petersburg, Russia

<sup>3</sup> The Biomedical Research Networking Center in Bioengineering, Biomaterials and Nanomedicine, ICMAB-CSIC, Bellaterra, 08193, Spain

\* E-mail: [laukhina@icmab.es](mailto:laukhina@icmab.es), [davydova@ineos.ac.ru](mailto:davydova@ineos.ac.ru)

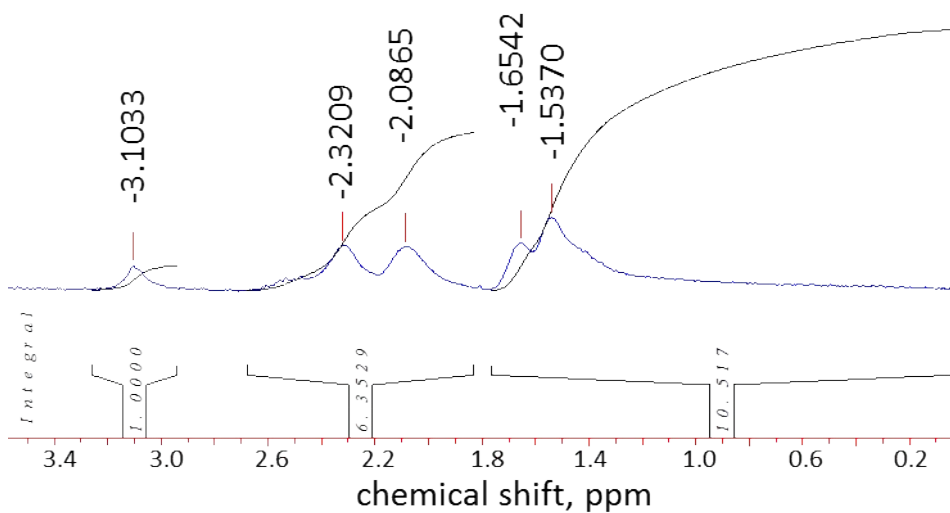

**Figure 1** <sup>1</sup>H NMR spectrum of acrylamide/3-(N, N-dimethylaminopropyl)-acrylamide copolymer.

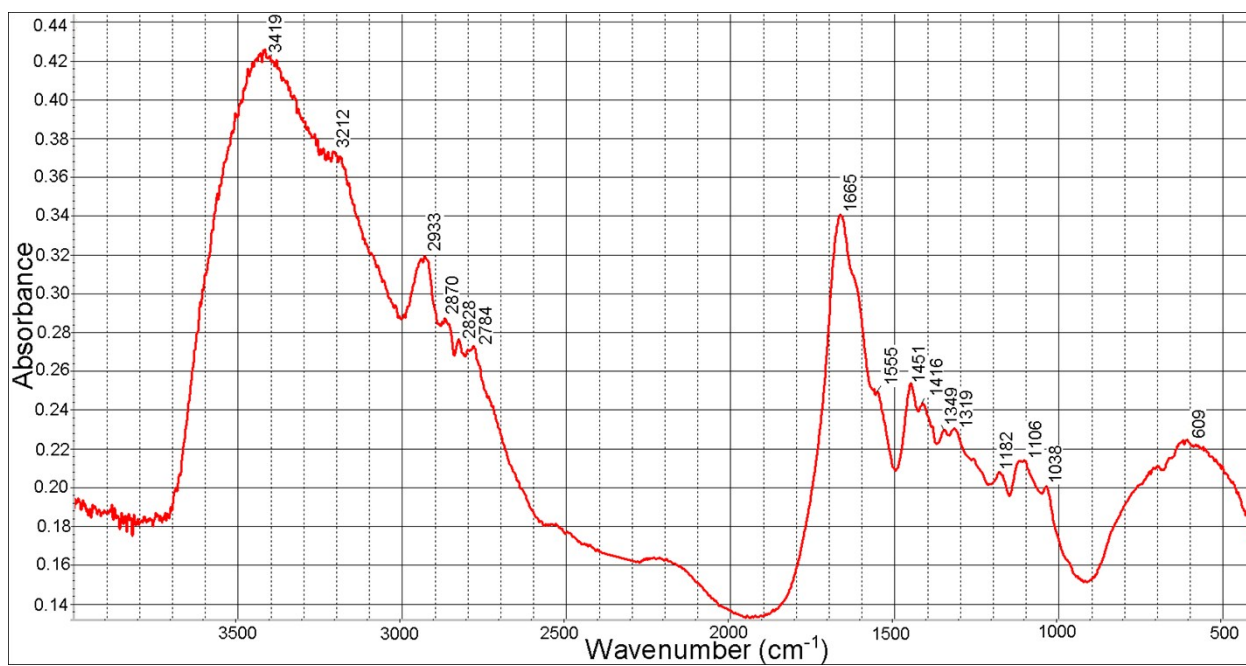

**Figure 2** IR spectrum of acrylamide/3-(N, N-dimethylaminopropyl)-acrylamide copolymer.

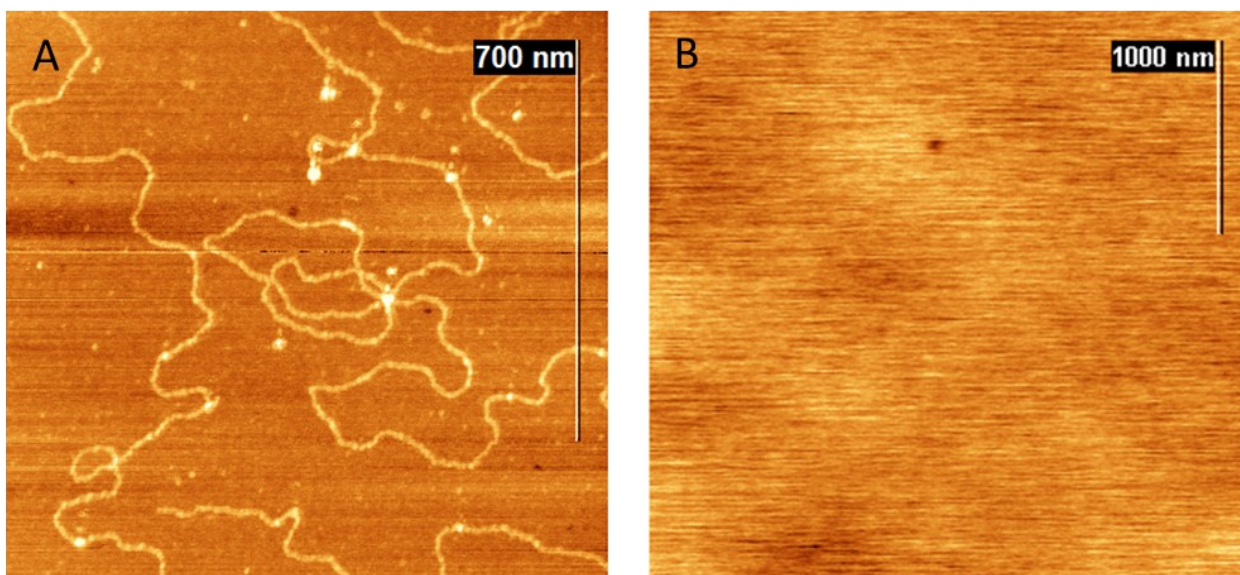

**Figure 3 SI** Topography images obtained by AFM: (A) DNA phage  $\lambda$ , (B) pure copolymer AADMAPA.

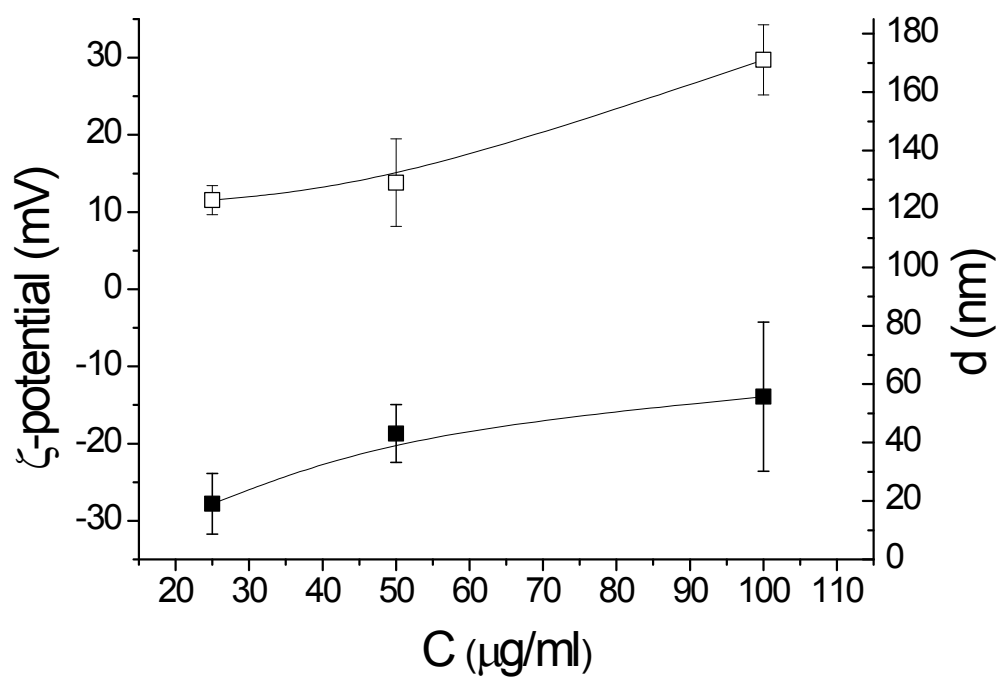

**Figure 4 SI** The dependence of  $\zeta$ - potential (filled squares) and the hydrodynamic radius (open squares) of DNA phage  $\lambda$  on its concentration in aqueous solution.

**Table 1** SI DNA ( $\lambda$ -phage – DNA (48.5 kbp, Fermentas))  $\mu\text{g}$  amounts and  $\mu\text{l}$  of its water solution added to 1000  $\mu\text{l}$  of the water solution of copolymer (concentration of AADMAPA was 0.1  $\mu\text{g}/\mu\text{l}$ ) to obtain AADMAPA/DNA complexes at different N/P ratios.

| N/P | DNA, $\mu\text{g}$ | water, $\mu\text{l}$ |
|-----|--------------------|----------------------|
| -   | 0                  | 0                    |
| 10  | 6                  | 20                   |
| 5   | 12                 | 40                   |
| 3.3 | 17.7               | 59                   |
| 2.5 | 23.7               | 79                   |
| 2   | 29.4               | 98                   |
| 1.7 | 35.4               | 118                  |
| 1.4 | 41.1               | 137                  |
| 1   | 58.5               | 195                  |

**Table 2** SI Zeta ( $\zeta$ )-potential, average diameter (D) and volume (V) of polyplexes at different N/P ratios.

| N/P ratio | Peak 1 |      | Peak 2 |      | Peak 3 |      | $\zeta$ -potential (mV) |
|-----------|--------|------|--------|------|--------|------|-------------------------|
|           | D, nm  | V, % | D, nm  | V, % | D, nm  | V, % |                         |
| 10        | -      | -    | 60     | 65   | 630    | 35   | $21 \pm 7$              |
| 5         | -      | -    | 70     | 69   | 650    | 31   | $20 \pm 3$              |
| 3.33      | -      | -    | 70     | 74   | 660    | 26   | $20 \pm 4$              |
| 2.5       | -      | -    | 70     | 63   | 710    | 37   | $14 \pm 3$              |
| 2         | -      | -    | 100    | 42   | 700    | 58   | $-17 \pm 5$             |
| 1.67      | -      | -    | 80     | 49   | 810    | 51   | $-32 \pm 4$             |
| 1.43      | 20     | 39   | 110    | 25   | 730    | 36   | $-33 \pm 5$             |
| 1         | 30     | 58   | 90     | 23   | 690    | 19   | $-43 \pm 7$             |
